# Supplementary material for: Analysis of Drug-Induced Gastrointestinal Obstruction and Perforation Using the Japanese Adverse Drug Event Report Database
Source: Front Pharmacol. 2021 Jul 26;12:692292. doi: 10.3389/fphar.2021.692292 (PMC8350341; doi:10.3389/fphar.2021.692292)
Supplement: Supplementary file 5 [file Table1.XLSX]

## Sheet: Sheet1
Table S1 Drug-induced gastrointestinal obstruction and perforation-related drugs and categorized them into 19 ATC-drug classes
ATC classification	Drugs
Alpha glucosidase inhibitors (ATC code: A10BF)	acarbose, miglitol, voglibose
Antipropulsives (ATC code: A07DA)	diphenoxylate, opium, loperamide, difenoxin, loperamide oxide, eluxadoline, morphine, combinations, loperamide, combinations
Barium sulfate containing X-ray contrast media (ATC code:V08BA)	barium sulfate with suspending agents
Butyrophenone derivatives (ATC code: N05AD)	haloperidol, trifluperidol, melperone, moperone, pipamperone, bromperidol, benperidol, droperidol, fluanisone
Coxibs (ATC code: M01AH)	celecoxib, rofecoxib, valdecoxib, parecoxib, etoricoxib, lumiracoxib, polmacoxib
Dantrolene and derivatives (ATC code: M03CA)	dantrolene
Diazepines, oxazepines, thiazepines, and oxepines (ATC code: N05AH)	loxapine, clozapine, olanzapine, quetiapine, asenapine, clotiapine
Drugs for treatment of hyperkalemia and hyperphosphatemia (ATC code: V03AE)	polystyrene sulfonate, sevelamer, lanthanum carbonate, calcium acetate and magnesium carbonate, sucroferric oxyhydroxide, colestilan, calcium acetate, ferric citrate, patiromer calcium, sodium zirconium cyclosilicate
Drugs for urinary frequency and incontinence (ATC code: G04BD)	emepronium, flavoxate, meladrazine, oxybutynin, terodiline, propiverine, tolterodine, solifenacin, trospium, darifenacin, fesoterodine, mirabegron, desfesoterodine
Natural opium alkaloids (ATC code: N02AA)	morphine, opium, hydromorphone, nicomorphine, oxycodone, dihydrocodeine, papaveretum, oxymorphone, morphine, combinations, hydromorphone and naloxone, oxycodone and naloxone, oxycodone and naltrexone, dihydrocodeine, combinations, codeine, combinations excl. psycholeptics, codeine, combinations with psycholeptics
Non-selective monoamine reuptake inhibitors (ATC code: N06AA)	desipramine, imipramine, imipramine oxide, clomipramine, opipramol, trimipramine, lofepramine, dibenzepin, amitriptyline, nortriptyline, protriptyline, doxepin, iprindole, melitracen, butriptyline, dosulepin, amoxapine, dimetacrine, amineptine, maprotiline, quinupramine
Oral bowel cleanser	sodium potassium combination (including sodium potassium ascorbic acid combination agent)
Other antineoplastic agents (ATC code: L01XX)	amsacrine, asparaginase, altretamine, hydroxycarbamide, lonidamine, pentostatin, masoprocol, estramustine, mitoguazone, tiazofurine, mitotane, pegaspargase, arsenic trioxide, denileukin diftitox, celecoxib, anagrelide, oblimersen, sitimagene ceradenovec, omacetaxine mepesuccinate, eribulin, aflibercept, talimogene laherparepvec, venetoclax, vosaroxin, plitidepsin, epacadostat, enasidenib, ivoside…
Other antipsychotics (ATC code: N05AX)	prothipendyl, risperidone, mosapramine, zotepine, aripiprazole, paliperidone, iloperidone, cariprazine, brexpiprazole, pimavanserin
Phenothiazines with aliphatic side-chain (ATC code: N05AA)	chlorpromazine, levomepromazine, promazine, acepromazine, triflupromazine, cyamemazine, chlorproethazine
Poly (ADP-ribose) polymerase (PARP) inhibitors (ATC code: L01XK)	olaparib, niraparib, rucaparib, talazoparib, veliparib
Proteasome inhibitors (ATC code: L01XG)	bortezomib, carfilzomib, ixazomib
Topoisomerase 1 (TOP1) inhibitors (ATC code: L01CE)	topotecan, irinotecan, etirinotecan pegol, belotecan
Vinca alkaloids and analogues (ATC code: L01CA)	vinblastine, vincristine, vindesine, vinorelbine, vinflunine, vintafolide
Boldface: number of cases ≥ 1
